# Supplementary material
Source: HighWire-hosted journal article supplement (https://thorax.bmj.com/content/73/1/13)
Supplement: inline-supplementary-material-2 [file inline-supplementary-material-2.pdf]

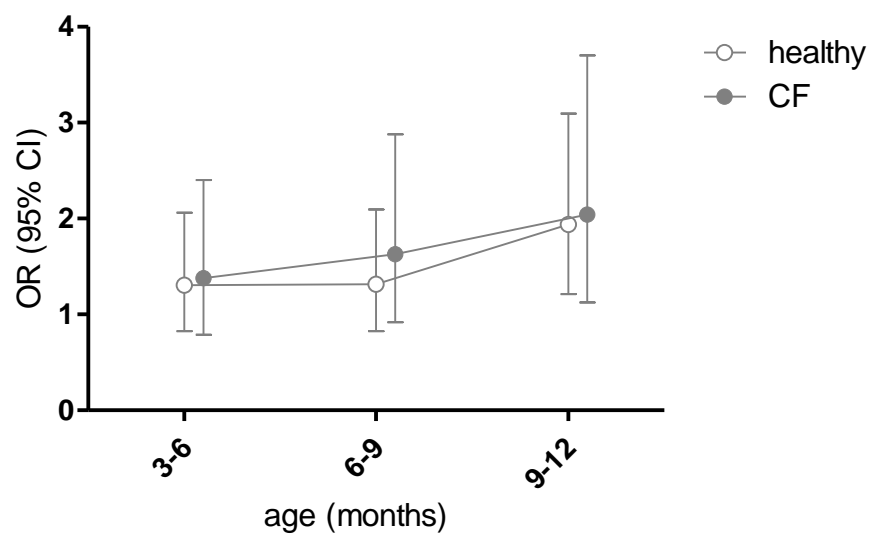

**Figure E1: increase of viral detection with age**

Displayed are the Odds Ratios (OR) (95% CI) of increasing viral detection with increasing age at 3-6 months, 6-9 months and 9-12 months compared to 0-3 months (baseline) in healthy infants and infants with CF. Results are adjusted for season.
